# Supplementary material
Source: PubMed Central journal article supplement (PMC6238734)
Supplement: jciinsight-3-124184-s149.pdf [file jciinsight-3-124184-s149.pdf]

**Supplementary Tables, Figures & Legends****Sitravatinib potentiates immune checkpoint blockade in refractory cancer models**

Du W, Huang H, Sorrelle N and Brekken RA

**Supplementary Table 1. Pharmacokinetic analysis of sitravatinib in mice**

| Time (hr) | Total sitravatinib (ng/ml) | Total (nM) | Free (nM) |
|-----------|----------------------------|------------|-----------|
| 0         | 150                        | 238        | 2.4       |
| 1         | 630                        | 1000       | 10        |
| 4         | 710                        | 1127       | 11.3      |
| 6         | 1300                       | 2033       | 20.6      |
| 10        | 580                        | 921        | 9.2       |
| 16        | 610                        | 968        | 9.7       |
| 24        | 420                        | 667        | 6.7       |

Mice were dosed at 20 mg/kg at time 0. Plasma was collected at the time points indicated and evaluated for total and free sitravatinib by mass spec analysis.

**Supplementary Table 2. RT-qPCR primers**

| Gene         | Forward (5'-3')              | Reverse (5'-3')              |
|--------------|------------------------------|------------------------------|
| <i>Actb</i>  | CGGTTCCGATGCCCTGAGGCT<br>CTT | CGTCACACTTCATGATGGAATT<br>GA |
| <i>Tnfa</i>  | TGTGAGGAAGGCTGTGCATT         | GGTCAGGTTGCCTCTGTCTC         |
| <i>Il6</i>   | CGTGGAATGAGAAAAGAGTT<br>GTGC | TGGTACTCCAGAAGACCAGAGG       |
| <i>Il12b</i> | AGCAGTAGCAGTTCCCCTGA         | AGTCCCTTTGGTCCAGTGTG         |
| <i>Arg1</i>  | CTCCAAGCCAAAGTCCTTAGA<br>G   | AGGAGCTGTCATTAGGGACATC       |
| <i>YM1</i>   | TCTGGGTACAAGATCCCTGAA        | TTTCTCCAGTGTAGCCATCCTT       |
| <i>Fizz1</i> | CCCTTCTCATCTGCATCTCC         | CTGGATTGGCAAGAAGTTCC         |

Supplementary Figure 1

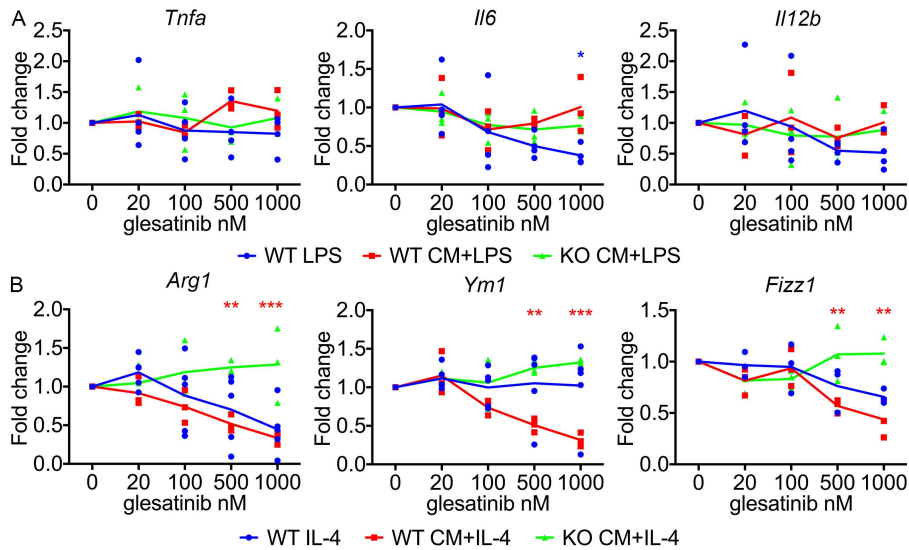

**Supplementary Figure 1. MerTK inhibition with glesatinib directly affects macrophage phenotype.** The expression of M1-type macrophage markers TNF- $\alpha$ , IL-6, and IL-12 (A) and M2-type macrophage markers arginase1, YM-1 and Fizz-1 (B) in bone marrow-derived macrophages (BMDMs). BMDMs were harvested from WT C57Bl/6 or *MerTK*<sup>-/-</sup> (green) mice, stimulated with 20 ng/ml LPS for 2 hours (A) or 40 ng/ml IL-4 for 18 hours (B). Each stimulation was performed +/- glesatinib (20, 100, 500, and 1000 nM) in the presence (red and green) or absence (blue) of conditioned media (CM) collected from KLN205 cells. The expression level of TNF- $\alpha$ , IL-6, IL-12, arginase1, YM-1, and Fizz-1 was determined by q-PCR. Three independent experiments using duplicate samples were performed. Data are displayed as fold change normalized to DMSO (0 nM) in each condition, mean  $\pm$  SD. \* $P$  < 0.05, \*\* $P$  < 0.01, \*\*\* $P$  < 0.005 vs. DMSO in each condition by ANOVA.

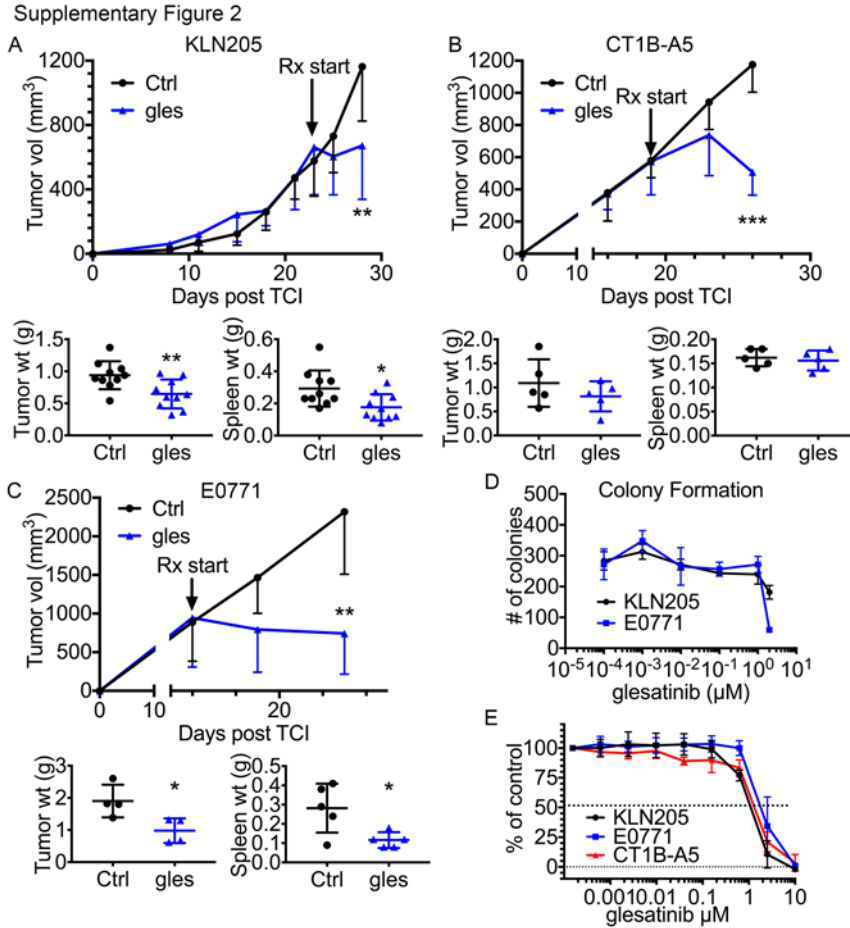

**Supplementary Figure 2. Glesatinib alone has potent antitumor activity in vivo. A), B), and C)** In vivo assessment of treatment response of subcutaneously or orthotopically implanted tumors. We injected  $0.5 \times 10^6$  KLN205 cells (**A**,  $n=11/\text{group}$ ) subcutaneously into 6-week-old DBA/2 mice,  $1 \times 10^6$  CT1B-A5 cells (**B**,  $n=5/\text{group}$ ) were injected subcutaneously into 6-week-old C57BL/6 mice, and  $0.5 \times 10^6$  E0771 cells (**C**,  $n=5/\text{group}$ ) were injected orthotopically into the mammary fat pad of 6-week-old female C57BL/6 mice. Mice with established tumors (500-700 mm<sup>3</sup>) were treated with control (Ctrl, vehicle, once per day) and glesatinib (gles, p.o. 60 mg/kg, q.d.). Effects on tumor growth are shown after 6 days of treatment. Tumor and spleen weight were determined in each mouse and was displayed as mean  $\pm$  SD. \* $P < 0.05$ , \*\* $P < 0.01$ , \*\*\* $P < 0.005$  vs. control by  $t$  test. **D)** Colony formation for E0771 cell line grown in normal growth media  $\pm$  glesatinib at the indicated doses for 14 days. Two independent experiments using triplicate samples were performed. Mean  $\pm$  SD colonies/hpf are shown. **E)** Cell growth assays were performed in a 96-well format for 5 days using MTS. Three independent experiments using two 96-well plates/cell line were performed. Drug-sensitivity curves for 265 are displayed.

Supplementary Figure 3

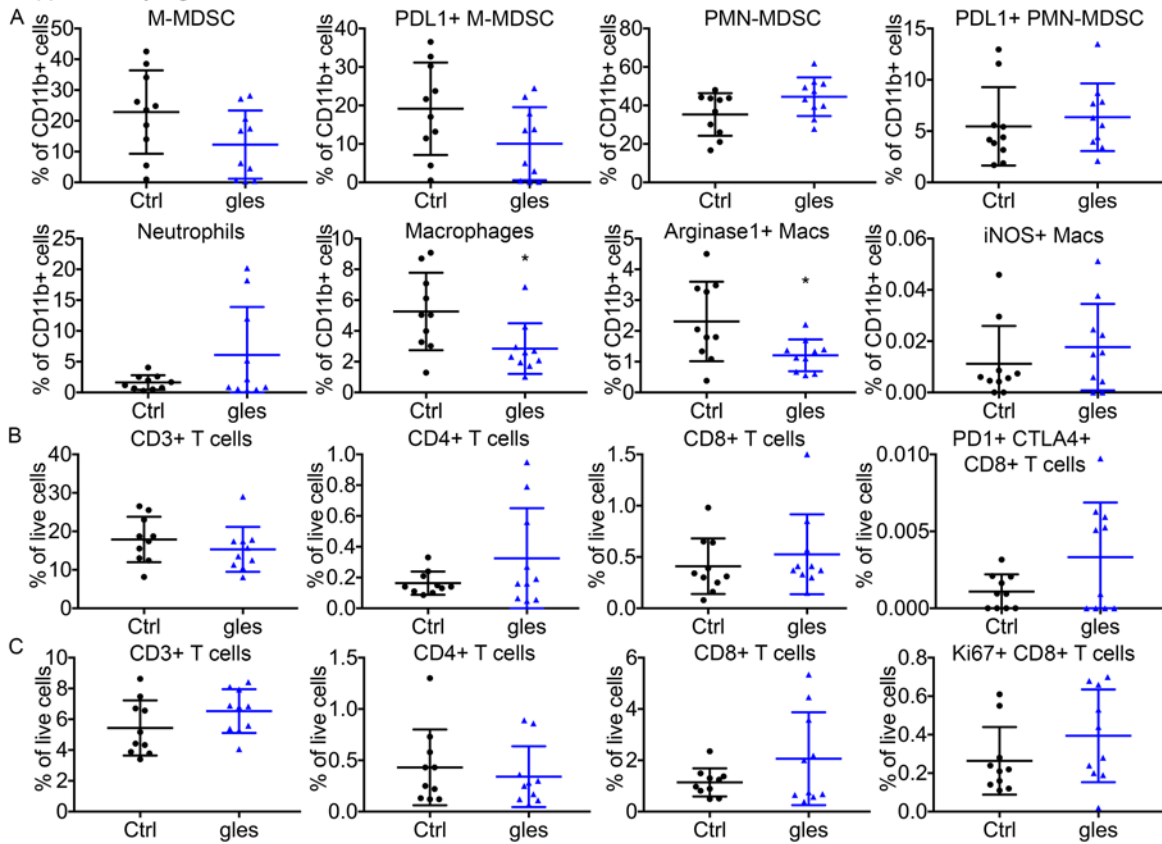

**Supplementary Figure 3. Glesatinib alters the immune landscape of tumors to favor immune checkpoint blockade.** Flow cytometry of tumor-associated myeloid (A) and lymphoid cells (B) from mice bearing KLN205 tumors treated for 6 days with glesatinib (gles,  $n = 9-10$ /group). Monocytic myeloid-derived suppressor cells (M-MDSCs; CD11b+ Ly6G- Ly6C+), PD-L1+ M-MDSCs, PMN-MDSCs (CD11b+ Ly6G+ Ly6C+), PD-L1+ PMN-MDSC, neutrophils (CD11b+ Ly6G+ Ly6C-), macrophages (CD11b+ Ly6G- Ly6C- F4/80+ CD11c+ MHCII+), Arg1+ macrophages (Macs), iNOS+ macrophages, CD3+ T cells, CD4+ T cells, CD8+ T cells, and PD1+ CTLA4+ CD8+ T cells were analyzed.  $*P < 0.05$  vs. control (Ctrl) by  $t$  test. **C**) Flow cytometry of splenocytes from mice bearing KLN205 tumors treated with glesatinib for 6 days ( $n = 9-10$ /group). CD3+ T cells, CD4+ T cells, CD8+ T cells and Ki67+ CD8+ T cells were analyzed.  $*P < 0.05$  vs. control by  $t$  test.

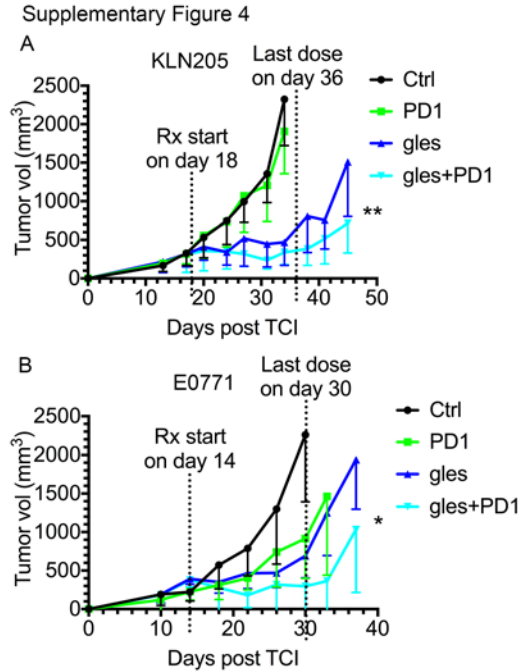

**Supplementary Figure 4. Glesatinib enhances the efficacy of PD-1 blockade. A, B)** In vivo assessment of treatment response of subcutaneously or orthotopically implanted tumors ( $n = 9-12/\text{group}$ ) in combination with PD-1 blockade. We injected  $0.5 \times 10^6$  KLN205 cells (**A**) subcutaneously into 6-week-old DBA/2 mice and  $0.5 \times 10^6$  E0771 cells (**B**) were injected orthotopically into the mammary fat pad of 6-week-old female C57BL/6 mice. Therapy was initiated in mice with tumor volume of  $300 \text{ mm}^3$  (KLN205) or  $500 \text{ mm}^3$  (E0771) and included control (Ctrl, vehicle, once per day), anti-PD1 (PD1, i.p. 10 mg/kg, every 3 days), glesatinib (gles, p.o. 60 mg/kg, q.d.), or anti-PD1 in combination with glesatinib at the indicated dose. Mice were treated for 2.5 weeks. \* $P < 0.05$ , \*\* $P < 0.01$  combo vs. glesatinib alone by  $t$  test.
